# Supplementary material for: Foods to Avoid While Breastfeeding? Experiences and Opinions of Polish Mothers and Healthcare Providers
Source: PubMed Central journal article supplement (PMC7352950; doi:10.3390/nu12061644), 2020-06-02
Supplement: nutrients-12-01644-s001.pdf [file nutrients-12-01644-s001.pdf]

# Dieta matki karmiącej piersią - fakty czy mity?

Szanowni Państwo!

Jesteśmy doktorantkami w Klinice Neonatologii Uniwersytetu Medycznego we Wrocławiu. Zwracamy się z prośbą o wypełnienie kwestionariusza ankietowego, przygotowanego w ramach badania dotyczącego diety matki karmiącej piersią w Polsce. Adresatami ankiety są Panie, które kiedykolwiek karmiły dziecko piersią (dopuszcza się karmienie mlekiem własnym przy pomocy np. butelki) - prosimy, aby ankietę wypełniły Panie, które urodziły dziecko po ukończonym 37 tygodniu ciąży; oraz personel medyczny (bez względu na płeć i dziełność).  
Prosimy

Niniejsza ankieta jest w pełni anonimowa. Uzyskane wyniki zostaną wykorzystane do przygotowania opracowania naukowego .

Wypełnienie ankiety jest równoznaczne ze zgodą na udział w badaniu.

Bardzo dziękujemy za poświęcenie Państwa czasu!

**\*Wymagane**

1. **Zaznacz tylko jedną odpowiedź.**

Opcja 1

2. **Czy matka karmiąca piersią może jeść niżej wymienione produkty/ potrawy? \***

Zaznacz tylko jedną odpowiedź w rzędzie.

|                                       | Tak                   | Nie                   |
|---------------------------------------|-----------------------|-----------------------|
| Tatar                                 | <input type="radio"/> | <input type="radio"/> |
| Sushi                                 | <input type="radio"/> | <input type="radio"/> |
| Miód                                  | <input type="radio"/> | <input type="radio"/> |
| Grzyby                                | <input type="radio"/> | <input type="radio"/> |
| Sery pleśniowe                        | <input type="radio"/> | <input type="radio"/> |
| Kapusta                               | <input type="radio"/> | <input type="radio"/> |
| Nasiona strączkowe, np. groch, fasola | <input type="radio"/> | <input type="radio"/> |
| Czekolada                             | <input type="radio"/> | <input type="radio"/> |
| Woda i napoje gazowane                | <input type="radio"/> | <input type="radio"/> |
| Kawa                                  | <input type="radio"/> | <input type="radio"/> |
| Cytrusy                               | <input type="radio"/> | <input type="radio"/> |
| Owoce pestkowe                        | <input type="radio"/> | <input type="radio"/> |
| Orzechy                               | <input type="radio"/> | <input type="radio"/> |
| Nabiał                                | <input type="radio"/> | <input type="radio"/> |
| Czosnek                               | <input type="radio"/> | <input type="radio"/> |
| Cebula                                | <input type="radio"/> | <input type="radio"/> |
| Pikantne przyprawy                    | <input type="radio"/> | <input type="radio"/> |

3. Proszę odnieść się do poniższych stwierdzeń zgodnie z własnymi przekonaniem:

*Zaznacz tylko jedną odpowiedź w rzędzie.*

|                                                                                                                                   | Prawda                | Falsz                 |
|-----------------------------------------------------------------------------------------------------------------------------------|-----------------------|-----------------------|
| Bawarka (herbata z mlekiem) zwiększa laktację                                                                                     | <input type="radio"/> | <input type="radio"/> |
| Picie dużej ilości wody zwiększa produkcję mleka                                                                                  | <input type="radio"/> | <input type="radio"/> |
| Dziecko karmione piersią płacze, bo matka niewłaściwie się odżywia                                                                | <input type="radio"/> | <input type="radio"/> |
| Ostre przyprawy w pożywieniu zmieniają smak mleka matki                                                                           | <input type="radio"/> | <input type="radio"/> |
| Dieta matki karmiącej to dieta zbilansowana, z zaleceniami jak dla każdego innego człowieka                                       | <input type="radio"/> | <input type="radio"/> |
| Karmiąc piersią można jeść za dwoje, w dowolnej ilości                                                                            | <input type="radio"/> | <input type="radio"/> |
| Ostre przyprawy w pożywieniu matki powodują kolki u dziecka karmionego piersią                                                    | <input type="radio"/> | <input type="radio"/> |
| Niektóre substancje smakowe / zapachowe/ inne związki, np. białka przechodzą do mleka matki                                       | <input type="radio"/> | <input type="radio"/> |
| Dziecko karmione piersią płacze, bo się nie najada mlekiem matki (pytanie dotyczy w pełni rozwiniętej i ustabilizowanej laktacji) | <input type="radio"/> | <input type="radio"/> |
| W czasie laktacji nie wolno spożywać produktów alergizujących, np. cytrusów, czekolady, orzechów                                  | <input type="radio"/> | <input type="radio"/> |
| Nasion strączkowe, np. groch, w diecie matki powodują wzdęcia u dziecka                                                           | <input type="radio"/> | <input type="radio"/> |
| Dieta eliminacyjna u matki od początku laktacji uchroni dziecko przed problemami z brzuszkiem i alergiami                         | <input type="radio"/> | <input type="radio"/> |
| Dzieci matek, które piją kawę w czasie laktacji często budzą się w nocy                                                           | <input type="radio"/> | <input type="radio"/> |

### Piwo pobudza laktację

|                                                                                                                                  |                       |                       |
|----------------------------------------------------------------------------------------------------------------------------------|-----------------------|-----------------------|
| Dieta matki karmiącej to dieta w oparciu o szczególnie zalecenia dla kobiet w okresie laktacji                                   | <input type="radio"/> | <input type="radio"/> |
| Picie kawy w czasie laktacji jest dozwolone                                                                                      | <input type="radio"/> | <input type="radio"/> |
| Dieta eliminacyjna matki karmiącej piersią powinna być włączona tylko z istotnych wskazań medycznych                             | <input type="radio"/> | <input type="radio"/> |
| Mleko matek wegetarianek / weganek jest ubogie w składniki odżywcze, witaminy i minerały                                         | <input type="radio"/> | <input type="radio"/> |
| W czasie laktacji wzrasta dobowe zapotrzebowanie kaloryczne i płynowe                                                            | <input type="radio"/> | <input type="radio"/> |
| Krostki i rumień na buzi niemowlęcia to skaza białkowa - matka musi wyeliminować nabiał z diety                                  | <input type="radio"/> | <input type="radio"/> |
| Skład i jakość tłuszczów w mleku matki w dużej mierze zależy od diety                                                            | <input type="radio"/> | <input type="radio"/> |
| Dieta matki ma wpływ na stężenie jodu w mleku. Stężenie to zależy od zapasów jodu w organizmie matki.                            | <input type="radio"/> | <input type="radio"/> |
| Niedobór witaminy B12 w diecie matki jest czynnikiem ryzyka niedoboru tej witaminy u niemowlęcia.                                | <input type="radio"/> | <input type="radio"/> |
| Dieta matki ma niewielki wpływ na zawartość białka w mleku                                                                       | <input type="radio"/> | <input type="radio"/> |
| Matka karmiąca piersią nie powinna spożywać produktów smażonych i ciężkostrawnych, zalecane są jedynie gotowane i lekkie posiłki | <input type="radio"/> | <input type="radio"/> |

4. Czy ma Pan /Pani dzieci? Jeśli tak, **ile**? \*

Zaznacz tylko jedną odpowiedź.

- Nie  
 1  
 2  
 3  
 4 lub więcej

5. Płeć \*

Zaznacz tylko jedną odpowiedź.

- Kobieta  
 Mężczyzna    *Polejdź do pytania 17*

6. Jak długo karmiła / karmi Pani piersią pierwsze dziecko? (czas podany w miesiącach) \*

Zaznacz tylko jedną odpowiedź.

- nie dotyczy  
 0  
 1  
 2  
 3  
 4  
 5  
 6  
 7  
 8  
 9  
 10  
 11  
 12  
 13  
 14  
 15  
 16  
 17  
 18  
 19  
 20  
 21  
 22  
 23  
 24  
 25  
 26  
 27  
 28  
 29

- 30
- 31
- 32
- 33
- 34
- 35
- 36
- 37
- 38
- 39
- 40
- 41
- 42
- 43
- 44
- 45
- 46
- 47
- 48
- 49
- 50
- ponad 50

7. Jak długo karmiła / karmi Pani piersią drugie dziecko? (czas podany w miesiącach) \*

Zaznacz tylko jedną odpowiedź.

- nie dotyczy
- 0
- 1
- 2
- 3
- 4
- 5
- 6
- 7
- 8
- 9
- 10
- 11
- 12
- 13
- 14
- 15
- 16
- 17
- 18
- 19
- 20
- 21
- 22
- 23
- 24
- 25
- 26
- 27
- 28
- 29

- 30
- 31
- 32
- 33
- 34
- 35
- 36
- 37
- 38
- 39
- 40
- 41
- 42
- 43
- 44
- 45
- 46
- 47
- 48
- 49
- 50
- ponad 50

8. Jak długo karmiła / karmi Pani piersią trzecie dziecko? (czas podany w miesiącach) \*

Zaznacz tylko jedną odpowiedź.

- nie dotyczy
- 0
- 1
- 2
- 3
- 4
- 5
- 6
- 7
- 8
- 9
- 10
- 11
- 12
- 13
- 14
- 15
- 16
- 17
- 18
- 19
- 20
- 21
- 22
- 23
- 24
- 25
- 26
- 27
- 28
- 29

- 30
- 31
- 32
- 33
- 34
- 35
- 36
- 37
- 38
- 39
- 40
- 41
- 42
- 43
- 44
- 45
- 46
- 47
- 48
- 49
- 50
- ponad 50

9. Jak długo karmiła / karmi Pani piersią czwarte dziecko? (czas podany w miesiącach) \*

Zaznacz tylko jedną odpowiedź.

- nie dotyczy
- 0
- 1
- 2
- 3
- 4
- 5
- 6
- 7
- 8
- 9
- 10
- 11
- 12
- 13
- 14
- 15
- 16
- 17
- 18
- 19
- 20
- 21
- 22
- 23
- 24
- 25
- 26
- 27
- 28
- 29

- 30
- 31
- 32
- 33
- 34
- 35
- 36
- 37
- 38
- 39
- 40
- 41
- 42
- 43
- 44
- 45
- 46
- 47
- 48
- 49
- 50
- ponad 50

10. Jak długo karmiła / karmi Pani piersią najmłodsze dziecko? - proszę odpowiedzieć, jeśli ma Pani więcej niż 4 dzieci; jeśli nie, proszę zaznaczyć "nie dotyczy"(czas podany w miesiącach) \*

Zaznacz tylko jedną odpowiedź.

- nie dotyczy
- 0
- 1
- 2
- 3
- 4
- 5
- 6
- 7
- 8
- 9
- 10
- 11
- 12
- 13
- 14
- 15
- 16
- 17
- 18
- 19
- 20
- 21
- 22
- 23
- 24
- 25
- 26
- 27
- 28

- 29
- 30
- 31
- 32
- 33
- 34
- 35
- 36
- 37
- 38
- 39
- 40
- 41
- 42
- 43
- 44
- 45
- 46
- 47
- 48
- 49
- 50
- ponad 50

11. Czy kiedykolwiek przestała Pani karmić piersią i włączyła mleko modyfikowane do diety dziecka z powodu konieczności przestrzegania restrykcyjnej diety eliminacyjnej? \*

Zaznacz tylko jedną odpowiedź.

- Tak
- Nie

12. Czy w czasie laktacji stosowała Pani dietę eliminacyjną? \*

Zaznacz tylko jedną odpowiedź.

- Tak
- Nie *Przejdź do pytania 17*

13. W czasie karmienia którego dziecka stosowała Pani dietę eliminacyjną? \*

Zaznacz wszystkie właściwe odpowiedzi.

- Każdego
- Pierwszego
- Drugiego
- Trzeciego
- Czwartego
- Kolejnego po czwartym

14. Czy dietę eliminacyjną w czasie laktacji zalecił lekarz? \*

Zaznacz tylko jedną odpowiedź.

- Tak
- Nie

15. Czy zalecona dieta eliminacyjna wynikała ze wskazań medycznych (np. alergia na białka mleka krowiego)? \*

Zaznacz tylko jedną odpowiedź.

- Tak
- Nie



16. Czy dieta eliminacyjna w czasie laktacji wynikała z presji osób w otoczeniu, np. rodziny, znajomych? \*

Zaznacz tylko jedną odpowiedź.

- Tak  
 Nie

21. Wiek (proszę podać w latach) \*

\_\_\_\_\_

Ta treść nie została utworzona ani zatwierdzona przez Google.

Formularze Google

17. Wykonywany zawód: \*

Zaznacz tylko jedną odpowiedź.

- Wykonuję zawód medyczny (lekarz, lekarz stomatolog, pielęgniarka, położna, fizjoterapeuta, ratownik medyczny, dietetyk)  
 Nie wykonuję zawodu medycznego *Przejdź do pytania 19*

18. Czy kiedykolwiek zalecił Pan / zaleciła Pani matce w okresie laktacji prewencyjną dietę eliminacyjną? \*

Zaznacz tylko jedną odpowiedź.

- Tak  
 Nie

Metryczka

19. Narodowość: \*

20. Miejsce zamieszkania \*

Zaznacz tylko jedną odpowiedź.

- Wieś  
 Miasto < 100 tys. mieszkańców  
 Miasto > 100 tys. mieszkańców
